# Supplementary material for: Spatial association with PTEX complexes defines regions for effector export into Plasmodium falciparum-infected erythrocytes
Source: PubMed Central journal article supplement — Nat Commun. 2013 Jan 29;4:1415–. doi: 10.1038/ncomms2449 (PMC3562467; doi:10.1038/ncomms2449), 2013-01-29
Supplement: ncomms2449-s1.pdf [file ncomms2449-s1.pdf]

## **Supplementary Material:**

# **Spatial association with PTEX complexes defines regions for effector export into *Plasmodium falciparum*-infected erythrocytes**

David T. Riglar<sup>1,2</sup>, Kelly L. Rogers<sup>1,2</sup>, Eric Hansen<sup>3</sup>, Lynne Turnbull<sup>4</sup>, Hayley E. Bullen<sup>2,5</sup>, Sarah C. Charnaud<sup>5,6</sup>, Jude Przyborski<sup>7</sup>, Paul R. Gilson<sup>5,8</sup>, Cynthia B. Whitchurch<sup>4</sup>, Brendan S. Crabb<sup>5,8,9</sup>, Jake Baum<sup>1,2</sup> and Alan F. Cowman<sup>1,2</sup>.

<sup>1</sup> The Walter and Eliza Hall Institute of Medical Research, Parkville, VIC 3052, Australia.

<sup>2</sup> Department of Medical Biology, <sup>3</sup> Electron Microscopy Unit, Bio21 Molecular Science and Biotechnology Institute, and <sup>8</sup> Department of Microbiology and Immunology, University of Melbourne, Parkville, VIC 3052, Australia.

<sup>4</sup> The ithree institute, University of Technology Sydney, Sydney, NSW 2007, Australia.

<sup>5</sup> Macfarlane Burnet Institute for Medical Research and Public Health, Melbourne, VIC 3004, Australia.

<sup>6</sup> Faculty of Medicine, Nursing and Health Sciences, Monash University, Clayton, VIC 3800, Australia.

<sup>7</sup> Department of Parasitology, Philipps University Marburg, Marburg 35043, Germany.

<sup>8</sup> Department of Immunology, Monash University, VIC 3800, Australia.

<sup>9</sup> Department of Microbiology and Immunology, The University of Melbourne, VIC 3010, Australia.

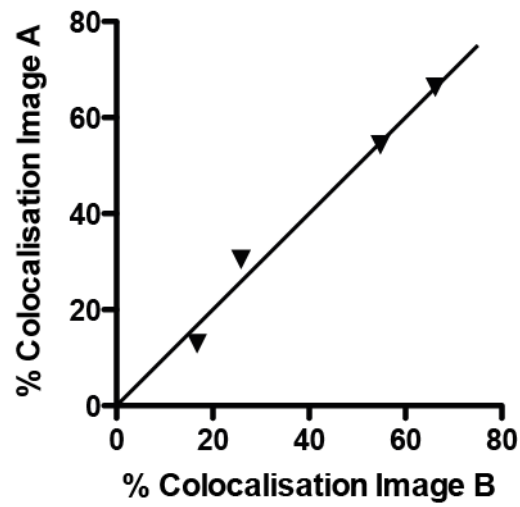

**Supplementary Figure S1. Colocalisation analysis is robust upon repeated analysis of individual parasites.**

Comparison of “% colocalisation” values between two independent measurements of four separate parasites from the HSP101HA <10 min time point showed consistency of results, as shown by proximity to the  $y=x$  line.

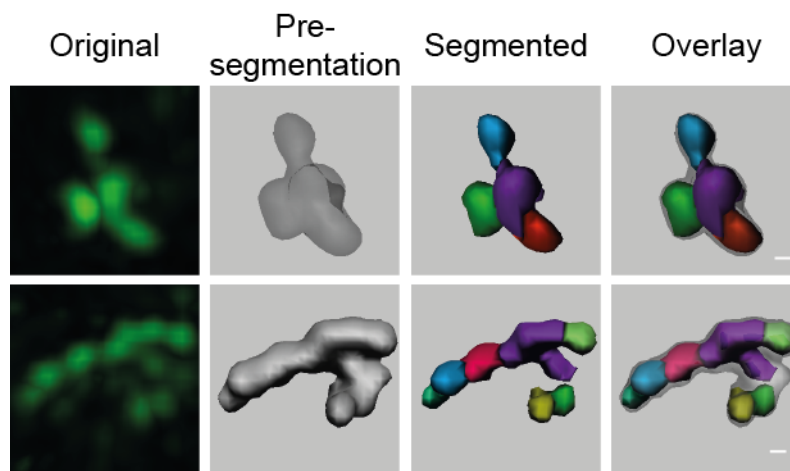

**Supplementary Figure S2. Upon manual evaluation EXP2 segmentation protocols identified and split regions as expected.**

Automated imaging analysis was used to identify large “presegmentation” EXP2 clusters and “segmented” EXP2 foci using a region-growing algorithm. An example of the extensive manual evaluation of the regions identified by the automated protocols showed that isolation and region splitting occurred in line with observed fluorescent foci from original data. Scale = 100 nm.

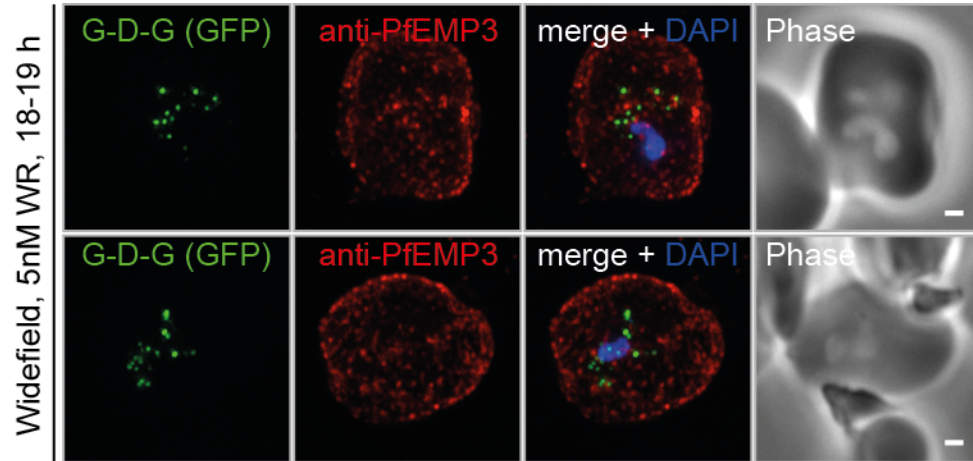

**Supplementary Figure S3. Native protein export occurs as normal upon the addition of WR.**

Widefield deconvolution imaging of GBP130-DHFR-GFP expressing parasites grown in the presence of 5nM WR, showed export of native proteins is unimpeded by WR addition. Green = GFP, Red = PfEMP3, Blue = DAPI (nucleus).

Scale = 1  $\mu$ m.

**Supplementary Table S1. EXP2 size and distribution analysis statistics, as depicted graphically in Figure 3D.**

| Timepoint | n  | Pre-Segmentation<br>Mean $\pm$ SEM ( $\times 10^{-3}$ ) $\mu\text{m}^3$ | Segmented<br>Mean $\pm$ SEM ( $\times 10^{-3}$ ) $\mu\text{m}^3$ |
|-----------|----|-------------------------------------------------------------------------|------------------------------------------------------------------|
| <12 min   | 19 | 26.1 $\pm$ 2.7                                                          | 9.2 $\pm$ 0.3                                                    |
| 60-90 min | 27 | 16.6 $\pm$ 1.4                                                          | 8.7 $\pm$ 0.4                                                    |
| 11-12 h   | 37 | 9.2 $\pm$ 0.5                                                           | 7.1 $\pm$ 0.3                                                    |
| 18-19 h   | 22 | 11.8 $\pm$ 0.7                                                          | 7.6 $\pm$ 0.5                                                    |
